1 **No association of mitochondrial DNA levels in trophectodermal cells with the developmental**  
2 **competence of the blastocyst and pregnancy outcomes**

3 Ritu G<sup>1</sup>, Geetha Veerasigamani<sup>2</sup>, Mohammed C. Ashraf<sup>2</sup>, Sankalp Singh<sup>2</sup>, Saniya Laheri<sup>3</sup>,  
4 Deepak Modi<sup>3</sup>

5 <sup>1</sup>Department of Medical Genetic, Craft Hospital and research Center, Chandappura, Kodungallur,  
6 Pin - 680664, Thrissur District, Kerala. India.

7 <sup>2</sup>Department of Reproductive Medicine, Craft Hospital and Research Center, Chandappura,  
8 Kodungallur, Pin- 680664, Thrissur District, Kerala. India.

9 <sup>3</sup>Molecular and Cellular Biology Laboratory, National Institute for Research in Reproductive  
10 Health (ICMR), J. M. Street, Parel, Mumbai - 400012, India.

11 Correspondence address. E mail: [raorit@gmail.com](mailto:raorit@gmail.com)

12 Running title: Mitochondrial DNA levels in outcomes of assisted reproduction.

13 Key words: Mitochondrial DNA/ Next Generation Sequencing/ blastocyst/ implantation/ ploidy/  
14 maternal age/morphology

15

16 **Abstract**

17 **Study question**

18 Can mitochondrial DNA (mtDNA) levels in trophoctodermal cells of the blastocyst predict the  
19 blastocyst quality, ploidy status, implantation rate and clinical outcomes?

20 **Summary answer**

21 mtDNA levels in trophoctodermal cells of the blastocyst do not associate with the blastocyst  
22 quality, ploidy status, implantation potential and clinical outcomes, but can differentiate between  
23 aneuploid and euploid blastocysts.

24 **What we already know**

25 mtDNA levels in the trophoctodermal cells have been suggested to be associated with blastocyst  
26 morphology, ploidy and implantation rates, and has been proposed as biomarker to assess  
27 blastocyst quality and predict clinical outcomes. However, discrepancies exist if mtDNA levels  
28 could serve as a marker for the same.

29 **Study design and duration**

30 Retrospective analysis of mtDNA levels in trophoctodermal cells obtained from blastocysts  
31 undergoing preimplantation genetic testing for aneuploidy (PGT-A) at Craft Hospital & Research  
32 Center, Kerala from January 2016- July 2017.

33 **Participants/materials and methods**

34 Study included data from 287 blastocyst from (61) couples who underwent PGT-A using next  
35 generation sequencing (NGS). Levels of mtDNA in trophoctodermal cells of the blastocyst were

36 estimated by the NGS. Comparison of mtDNA levels with maternal age, blastocyst morphology,  
37 ploidy status, implantation rates, miscarriage rates and live birth rate was done.

### 38 **Main results**

39 The levels of mtDNA in the trophectoderm of the blastocyst did not correlate with maternal age.  
40 There was no significant difference in the mtDNA levels between grade 1 and grade 2 blastocyst.  
41 Euploid blastocyst had significantly lower amounts of mtDNA levels in trophectodermal cells of  
42 the blastocyst were compared to aneuploid blastocyst. No significant differences were seen  
43 between mtDNA levels and implanting and non-implanting blastocysts or those resulted into  
44 miscarriage or live birth.

### 45 **Limitations**

46 The study is limited by a small sample size and hence type II error cannot be ruled out.

### 47 **Wider Implications**

48 The study does not support the potential use of mtDNA levels in the trophectodermal cells as  
49 biomarker for blastocyst quality and predicting clinical outcomes needs.

### 50 **Study funding/competing interest(s)**

51 There is no external funding for the study. There is no conflict of interest.

## 52 **Introduction**

53 Assisted reproduction (ART) has witnessed significant progress in the last three decades and has  
54 benefitted many infertile couples. Despite, the advancement in ART, the take-home baby rates are  
55 still low (Sadeghi et al., 2012). Various factors which contribute to success rate of ART include  
56 maternal and paternal age, gamete quality, endometrial receptivity and most importantly embryo  
57 quality (Colaco and Sakkas, 2018; Miao et al., 2009; Oron et al., 2014; Revel, 2012). The current  
58 embryo selection methods rely on assessment of embryo morphology with a subjective grading  
59 criteria or a real time monitoring of the embryonic development and assessment of multiple  
60 quantitative endpoints. However, none of these have been of great aid in improving pregnancy  
61 rates (Bromer and Seli, 2008; Capalbo et.al., 2014; Minasia et.al., 2016). The advent of single cell  
62 genetic analysis, has made it apparent that a large number of embryos developed *in vitro* are  
63 chromosomally aneuploid (Demko et.al., 2016). This has prompted the evaluation of chromosomal  
64 complement of the embryos by preimplantation genetic testing for aneuploidy (PGT-A). While the  
65 introduction of PGT-A has led to reduction in miscarriage, the improvements in live birth rate  
66 following PGT-A remains relatively low and as many as 50% of embryos diagnosed as “euploid”  
67 by PGT-A do not implant (Capalbo et al., 2015; Chang et.al., 2016). Thus, genomic aneuploidy  
68 may not be a sole factor responsible for failure of implantation and hence there is a need to identify  
69 embryo selection markers for improving pregnancy rates.

70 Recently, levels of mitochondrial DNA (mtDNA) has emerged as possible marker for embryo  
71 selection (Cecchino et al., 2019, Humaidan et al., 2018, Kim & Seli, 2019). Fragouli and group  
72 were the first to report that high levels of mtDNA in embryos derived from older mothers or  
73 embryos with aneuploid and embryos with higher levels of mtDNA rarely implant (Fragouli et.al.,  
74 2015). These initial findings were subsequently confirmed in a large blinded retrospective study

75 by same group. Large cohort studies have suggested, the quantity of mtDNA as a new biomarker  
76 to assist embryo selection (Fragouli et.al., 2017; Ravichandran et.al., 2017). The above studies  
77 were confirmed by two more groups independently (de Los Santos et al., 2018; Diez-Juan et al.,  
78 2015). However, three additional studies have failed to show any such correlation. Treff and group  
79 reported no association between mtDNA levels in implanted and non-implanted embryos (Treff  
80 et. al., 2017). In another study the authors argued that the differences in mtDNA content could  
81 arise out of differences in genomic DNA content, and hence a normalization factor was used,  
82 which led to the conclusion that the levels of mtDNA are near identical between blastocysts  
83 stratified by ploidy, maternal age, or implantation potential (Victor et.al., 2017). Another study by  
84 Qui and group failed to establish any correlation between mtDNA, embryo quality and clinical  
85 outcomes (Qui et al., 2018). Thus, the levels of mtDNA in predicting the embryo quality,  
86 implantation potential of embryos and pregnancy outcomes remains controversial.

87 In the current study, we present our experience with use of trophectodermal mtDNA levels to  
88 determine blastocyst quality, implantation potential of blastocyst and clinical outcomes that have  
89 undergone PGT-A in a clinical setup. Our results reveal no significant association of  
90 trophectodermal mtDNA levels with maternal age, implantation potential and clinical outcomes,  
91 however mtDNA levels in trophectodermal cells of the blastocyst can differentiate between  
92 euploid and aneuploid blastocyst.

### 93 **Materials and Methods**

94 This was a retrospective study of next generation sequencing (NGS) workflow data from patients  
95 who underwent PGT-A between January 2016 to July 2017 at Craft hospital and Research Center,  
96 Kerala, India. The study was approved by the ethical review board of Craft Hospital & Research

97 Center, Kodungallur, Kerala (ethics no: 002/21/3/2019).

## 98 **Study group**

99 At the Craft Hospital and Research Center we routinely offer PGT-A to patients with recurrent  
100 implantation failure, recurrent pregnancy loss and advanced maternal age (above 35yrs). The  
101 patient characteristics are described in Table 1. A total of 61 couples agreed to undergo PGT-A by  
102 NGS from January 2016 to July 2017. Written informed consent was obtained from  
103 patients/couples prior to the PGT-A.

## 104 **Ovarian stimulation, Intracytoplasmic sperm injection (ICSI) and embryo culture**

105 Controlled ovarian stimulation (COS) was done with antagonist protocol using gonadotropins with  
106 dosage between 150 – 300IU depending on age and body mass index. Oocytes were aspirated  
107 under local anesthesia after 36 h of agonist trigger. Denudation was done after 1h of oocyte  
108 retrieval. ICSI was performed as described previously (Velde et al., 1998). After ICSI, fertilization  
109 check was done next day, followed by day 3 embryo quality check. Good quality day 3 cleavage  
110 stage embryos (embryos with 6-8 cells, equal size of blastomere and cytoplasmic fragmentation  
111 less than 10%) were continued to grow till blastocyst stage. Zygotes were cultured in VITROMED  
112 culture medium for 5-6 days. Blastocysts quality was graded as described previously (Gardner et  
113 al., 2000; Sen et al., 2013). Patients that required oocyte accumulation, the oocytes were frozen  
114 within 30 mins after denudation and ICSI done later.

## 115 **Embryo/Blastocyst Biopsy and vitrification/freezing down (of blastocyst)**

116 Trophectoderm biopsy was done on day 5 embryos (blastocyst stage) as described previously  
117 (Capalbo et al., 2015). Briefly laser assisted hatching was performed using LYKOS Laser

118 (Hamilton Thorne; MA, USA) on day 3 embryo. On day 5, herniating blastocyst were selected,  
119 and 5-10 trophectoderm cells were removed by suction followed by laser pulsation. The  
120 trophectoderm cells were collected in phosphate buffer saline (PBS) and stored at  $-80^{\circ}\text{C}$  until  
121 further processing. Vitrification method was used to freeze down the blastocyst. The blastocysts  
122 were equilibrated in equilibration solution for 12 to 15 mins, followed by transfer to vitrification  
123 solution. This was finally transferred to cryolock containing liquid nitrogen.

#### 124 **Whole genome amplification and Next generation sequencing for trophectodermal cells**

125 Whole genome amplification (WGA) on each biopsy was performed using the Rubicon PicoPLEX  
126 WGA kit (Agilent, CA, USA) as per manufacture's recommendations. Following WGA, next  
127 generation sequencing (NGS) of the trophectodermal biopsies was carried out (Well et al., 2014).  
128 For constructing WGA library, Ion Xpress Plus fragment library kit, and Ion Xpress barcode  
129 adapters 1–32 kit were performed as per manufacturer's instructions (Thermo Fisher Scientific).  
130 150 ng of WGA DNA was fragmented to generate 280 base pair fragments using Ion Shear Plus  
131 reagent for 4 mins. Purification of fragmented DNA was done with Agencourt AMPure XP reagent  
132 beads (Beckman Coulter, CA, USA), followed by barcoded adaptor ligation, nick repair and  
133 purification as per manufacturer's instructions. E-Gel Size Select (Thermo Fisher Scientific)  
134 agarose gel was used to select a peak size of 280 base pairs, followed by amplification of DNA  
135 with 10 cycles of polymerase chain reaction (PCR) using Platinum PCR SuperMix High Fidelity  
136 (Thermo Fisher Scientific). Individual libraries were diluted to 100 pM. On Ion 520 Chip, a pool  
137 of 24 samples were loaded. Ion Sphere particles containing amplified DNA were prepared with  
138 Ion PI Template OT2 200 Kit v3 (Thermo Fisher Scientific). Template-positive Ion Sphere  
139 particles were enriched with the Ion OneTouch ES (Thermo Fisher Scientific). They were later  
140 sequenced with Ion 520 Chip and Ion PI Sequencing 200 Kit v3 on the Ion S5 instrument (Thermo

141 Fisher Scientific). Approximately 3 million reads were obtained for each barcoded sample.

#### 142 **Analysis of mtDNA levels**

143 The ploidy status and mtDNA levels were analyzed for all the blastocysts undergoing PGT-A with

144 NGS was assessed with Ion Reporter Cloud based software 5.3 (Thermo Fisher Scientific, MA,  
145 USA). The mitochondrial DNA levels were calculated: /

146 by Ion Reporter Software.

#### 147 **Embryo transfer**

148 Total of 287 blastocysts were investigated for mtDNA levels in trophectodermal cells, out of which

149 68 euploid embryos were selected who underwent frozen embryo transfer. The endometrium was

150 prepared for transplantation using hormone replacement protocol. Estradiol valerate was

151 administered from day 2 of cycle, in a dose dependent manner. Serial ultrasound monitoring was

152 done to check endometrium thickness (10mm), after which oral and vaginal progesterone were

153 administered and frozen embryo transfer was done. The vitrified blastocyst in the cryolock were

154 directly placed in transfer solution (TS), followed by washing with sucrose solution at 37°C. Serum

155 beta human chorionic gonadotropin levels were measured using HCG STAT Elecsys assay on

156 Cobas E601 Immunology Analyzer (Roche, Basel, Switzerland) after 2 weeks of embryo transfer

157 to detect biochemical pregnancy. Clinical pregnancy was determined by transvaginal ultrasound

158 was done at 6 weeks to see an intrauterine gestation sac.

#### 159 **Statistical analysis**

160 Linear regression analysis was done to study the correlation between maternal age at the time of

161 oocyte retrieval and mtDNA from trophectodermal cell of blastocyst. Correlation between mtDNA



162 level and blastocyst morphology, ploidy status and pregnancy outcomes were carried out. One-  
163 way ANOVA using Tukey's all column comparison test was performed using GraphPad Prism,  
164 version 5.  $p < 0.05$  was accepted as statistically significant.

165 **Results**

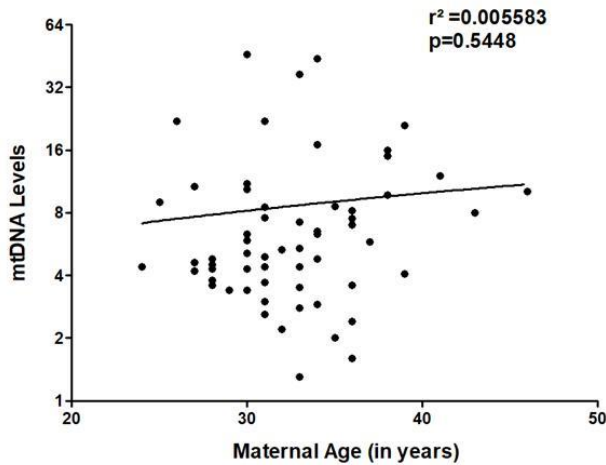

**Figure 1**

Correlation of mitochondrial DNA (mtDNA) levels in trophectodermal with maternal age at the time of oocyte retrieval. Values on X axis are maternal age in years. Y axis is mtDNA levels in the trophectodermal cells. Each dot represents data from one patient. The data is derived from 61 independent samples.  $p < 0.05$  was accepted as statistically significant.

166

167 **No correlation between mtDNA levels in trophectodermal cells of the blastocyst and**  
168 **maternal age at the time of oocyte retrieval**

169 To investigate the correlation between mtDNA levels in the trophectodermal cells of blastocyst  
170 and maternal age at the time of oocyte retrieval, mtDNA levels were analyzed from  
171 trophectodermal cells of blastocyst generated/collected from 61 women (between the range of 24-  
172 46 with an average age of  $32.6 \pm 4.13$ ). Linear regression analysis did not show any correlation  
173 between mtDNA levels in the trophectodermal cells of blastocyst and maternal age at the time of  
174 oocyte retrieval (Fig.1).

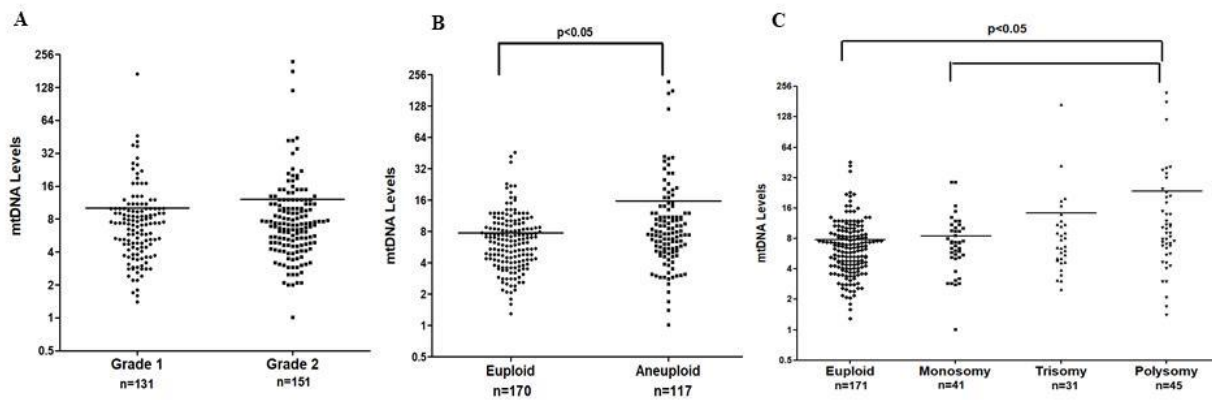

**Figure 2**

Association of levels of mitochondrial DNA (mtDNA) in trophoctodermal cells with blastocyst morphology and ploidy status. (A) Comparison of mtDNA levels in Grade 1 and Grade 2 blastocysts. (B) Comparison of mtDNA levels in euploid and aneuploid blastocysts (C) Comparison of mtDNA levels in euploid, monosomic, trisomic and polysomic blastocyst. In all the graphs, values on Y axis is mtDNA levels estimated by next generation sequencing. The numbers (n) of blastocysts are given in each case. Each dot represents data form one patient.  $p < 0.05$  was accepted as statistically significant.

175

176 **mtDNA levels in the trophoctodermal cells of the do not correlate with blastocyst morphology**

177 The predominant criteria for selection of blastocyst is morphological grading of the blastocyst. In  
178 order to evaluate if there was a correlation between the mtDNA levels in the trophoctodermal cells  
179 and grade 1 (n= 131) and grade 2 (n= 151) blastocyst were analyzed. PGT-A was not performed  
180 on grade 3 blastocyst and thus mtDNA levels are not calculated. The results revealed no difference  
181 in the mtDNA levels between grade 1 and grade 2 blastocysts (Fig.2A).

182 **mtDNA levels in trophoctodermal cells is higher in aneuploid blastocysts**

183 To study the correlation between mtDNA levels and ploidy status, the blastocysts were classified  
184 into euploid and aneuploid. Out of 287 blastocysts analyzed, 170 were euploid and 117 were  
185 aneuploid. Among 117 aneuploid blastocyst, 41 were monosomic, 31 were trisomic and 45 were  
186 polysomic (aneuploidy of more than 1 chromosome), mtDNA levels were significantly high in

187 aneuploid blastocysts compared to euploid blastocyst ( $p < 0.05$ , Fig. 2B). The mtDNA levels were  
188 significantly higher only in polysomic blastocysts as compared to euploid and monosomic ( $p <$   
189  $0.05$ , Fig 2C)

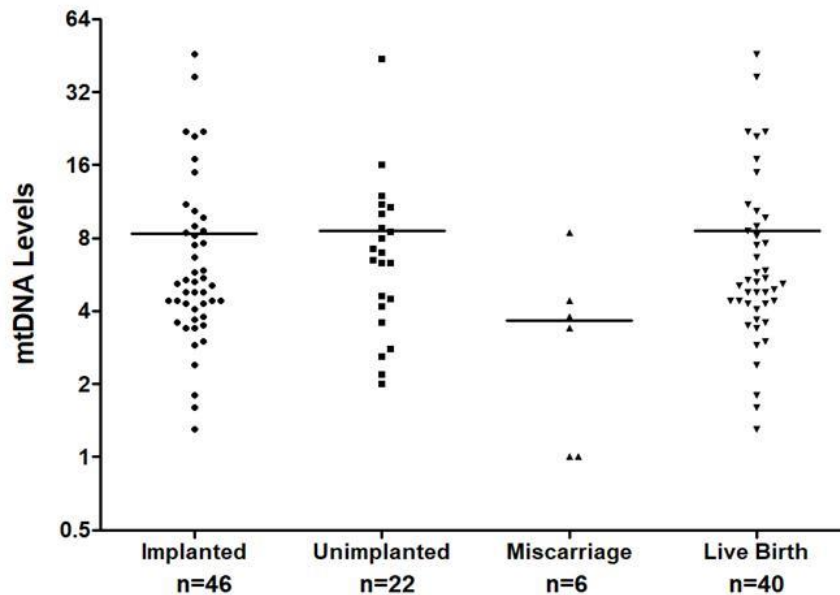

**Figure 3**

Association of mitochondrial DNA (mtDNA) levels in trophoctodermal cells implanted euploid embryos, and clinical outcomes. Values on Y axis is mtDNA levels. The numbers (n) of blastocysts are given in each case. Each dot represents data form one.  $p < 0.05$  was accepted as statistically significant

190

191 **Levels of mtDNA in trophoctodermal cells of blastocyst do not correlate with embryo**  
192 **implantation rate and clinical outcomes**

193 Implantation rate is defined as the number of gestational sacs seen at 6weeks of gestation in  
194 ultrasound divided by the total number of embryos transferred. All the couples had atleast one  
195 euploid embryo for transfer. Of these 4 couples had double embryo transfer. The remaining 57  
196 couples had single embryo transfer. Out of the 68 blastocyst, 46 blastocysts implanted, whereas  
197 22 blastocysts failed to implant. The overall implantation rate was 67.6%. There was no statistical

198 difference in levels of mtDNA of implanted blastocysts vs non- implanted. The couples who were  
199 positive for clinical pregnancy were followed up until end of term. There was no statistical  
200 significance difference in mtDNA levels and pregnancy that resulted in miscarriage or live birth  
201 (Fig 3).

## 202 **Discussion**

203 In the present study, we show the mtDNA levels in trophectodermal cells were high in aneuploid  
204 blastocysts; however, these mtDNA levels in trophectodermal cells could not predict blastocyst  
205 morphology, implantation potential and clinical outcomes.

206 The ultimate goal for researchers in the field of assisted reproduction is to devise strategies that  
207 can improve implantation rates and live birth. Sophisticated morphological grading of blastocyst  
208 and pre-implantation genetic screening have helped identify euploid embryos. Even with the  
209 elimination of aneuploid embryos, one-quarter of euploid embryos fail to implant, suggesting  
210 additional factors may be involved (Seli, 2016; Well, 2017). In recent years, mtDNA levels has  
211 gained significant importance in determination of embryo quality and pregnancy outcomes  
212 (Cecchino et al., 2019, Humaidan et al., 2018, Kim & Seli, 2019). Mitochondria is involved in  
213 various critical cellular processes such as energy generation in the form of ATP, homeostasis,  
214 amino acid synthesis and apoptosis. Elevated levels of mtDNA indicate dysfunctional  
215 mitochondrial machinery or compensatory mechanism to fulfill the requirements of the ever-  
216 growing embryo due to defective organelle (Leese 2002). It is well established that maternal age  
217 has detrimental effect on pregnancy outcomes (Miao et al., 2009). Earlier studies on mtDNA levels  
218 were low in cumulus cells or the oocytes from in the trophectodermal cells women with advanced  
219 age (Boucret et al., 2015; Chan et al., 2005; Onigo et al., 2016). Fragouli and group reported high

220 mtDNA levels in embryos from women with advanced maternal age at the time of oocyte retrieval  
221 (Fragouli et.al., 2015; 2017; Ravichandran et al., 2017). However, in this study we did not observe  
222 any correlation between maternal age (24-46 years) at the time of oocyte retrieval and mtDNA  
223 levels in trophoctodermal cells of blastocyst. Similar to our findings, other studies also failed to  
224 report any correlation between maternal age with mtDNA levels in the blastocysts (de Los Santos  
225 et al., 2018; Diez-Juan et al., 2015; Klimczak et al., 2018; Victor et al., 2017). Together the results  
226 indicate, maternal age does not contribute to alterations in mtDNA levels in the blastocysts.

227 A good quality embryo is vital for the success of ART. Gardner and Schoolcraft grading system is  
228 widely used to assess the morphology of the embryo (Gardner et al., 2000). The quiet embryo  
229 hypothesis by Leese suggest that good quality embryo have low metabolism, whereas the embryo  
230 under stress tend to be more metabolically active (Leese 2002). On the basis of this hypothesis,  
231 various studies have analyzed the levels of mtDNA and its association of the developmental  
232 competence. Studies have reported high levels of mtDNA in poor quality embryos (de Los Santos  
233 et al., 2018; Diez-Juan et al., 2015; Klimczak et al., 2018; Murakoshi et al., 2013). Interestingly,  
234 in our study, we did not find any correlation between morphological grading of blastocysts and  
235 mtDNA levels in the trophoctodermal cells. In concordance with our study, Qui et al., also failed  
236 to establish any such correlation (Qui et al., 2018). Thus, association between mtDNA levels in  
237 trophoctodermal cells and blastocyst quality is debatable. We next tested the levels of mtDNA in  
238 trophoctodermal cells and its association with ploidy status of the blastocyst. We observed higher  
239 levels of mtDNA in trophoctodermal cells of aneuploid blastocysts as compared to euploid  
240 blastocysts. Interestingly, the high level of mtDNA in trophoctodermal cells was restricted to  
241 polysomic blastocysts. Our results are consistent with earlier study, wherein polysomic embryos  
242 showed elevated levels of mtDNA (Fragouli et.al., 2015). Interestingly, in another study, embryos

243 with monosomies showed higher mtDNA levels as compared to embryos trisomies (de Los Santos  
244 et al., 2018). Whereas, some studies fail to show any association between chromosomal status of  
245 the blastocyst and mtDNA levels (Qui et al., 2018; Victor et.al., 2017). The association of mtDNA  
246 levels and the ploidy status of the blastocyst require further investigation.

247 Transfer of morphologically and developmentally competent blastocyst to the uterus does not  
248 always guarantee pregnancy. Fragouli and group showed euploid embryos with higher mtDNA  
249 levels failed to implant, whereas embryos with low mtDNA implanted successfully (Fragouli et  
250 al., 2015; 2017). Therefore, we checked if alterations in levels of mtDNA in trophoctodermal cells  
251 of euploid blastocyst could impact its implantation potential. However, our data failed to establish  
252 any correlation between levels of mtDNA in trophoctodermal cells and implantation potential of  
253 blastocyst. This is in concordance to earlier data where, no correlation such was observed (Qui et  
254 al., 2018; Victor et al., 2017). Finally, we asked if the mtDNA levels could predict outcomes of  
255 implanted blastocysts. The results revealed the levels of mtDNA in the blastocyst had no  
256 correlation with the pregnancy outcomes like miscarriage or live birth. Our study is in concordance  
257 to earlier studies where Qui et al., also failed to establish any correlation between mtDNA levels  
258 in blastocyst and clinical outcomes (Qui et al., 2018). Taken together, the use of mtDNA levels in  
259 the blastocyst as biomarker to predict implantation outcomes and pregnancy remains inconclusive.

260 From above it is evident that there are differences in reports from different studies. What could be  
261 the possible reason for the discrepancies should be addressed. In a recent study, embryos from  
262 women with higher body mass index (BMI) showed higher mtDNA copy number; and high levels  
263 of maternal serum progesterone inversely correlated with mtDNA levels (de Los Santos et al.,  
264 2018). It could be possible that there could be differences in BMI or serum progesterone levels in  
265 women in different studies. However, in our study, the baseline BMI and serum progesterone

266 levels did not significantly differ between the different groups and had no effect of mtDNA levels  
267 (data not shown). It is possible that technical differences in quantification of mtDNA levels,  
268 sample to sample variability, quantifying number of cells during biopsy, sample storage method  
269 ethics are some reasons for differences in results (Fragouli et al., 2013; Humaidan et al., 2018;  
270 Well, 2017). There is a need of defined selection criteria and standardized procedure to study if  
271 there is correlation between mtDNA and ART outcomes.

272 In summary, the present study fails to support the notion that trophoctodermal mtDNA level can  
273 predict the embryo quality, implantation ability of the blastocysts or pregnancy outcomes. The  
274 limiting factor of our study could be sample size, which fails to account for type II error. Larger  
275 study size along with standardized protocol for mtDNA evaluation, quantification and culture  
276 methods is the need of hour.

### 277 **Acknowledgement**

278 SL is grateful to Council of Scientific & Industrial Research (CSIR), India for Senior Research  
279 Fellowship.

### 280 **Author's role**

281 G.V., R.N., M.A., and S.S., the principal investigators take primary responsibility of the paper.

282 G.V., R.N.,M.A., did the clinical work, counselled the patients and collected the samples. RN  
283 performed the experiments analyzed the data. D.M., and S.L., contributed in data analysis, data  
284 interpretation. All the authors contributed in manuscript preparation.



285 **Funding**

286 No specific funding was obtained for this study.

287 **Conflict of interest**

288 The authors do not have conflict of interest.

289 **References**

- 290 Boucret L, Chao De La Barca JM, Moriniere C, Desquiret V, Ferre-L'Hotellier V, Descamps P,  
291 Marcaillou C, Reynier P, Procaccio V, May-Panloup P. Relationship between diminished ovarian  
292 reserve and mitochondrial biogenesis in cumulus cells. *Hum Rep.* 2015; **30** :1653-1664.
- 293 Bromer, JG, Seli, E. Assessment of embryo viability in assisted reproductive technology:  
294 shortcomings of current approaches and the emerging role of metabolomics. *Curr Opin Obstet*  
295 *Gynecol* 2008; **20** :234-241.
- 296 Capalbo A, Rienzi L, Cimadomo D, Maggiulli R, Elliott T, Wright G, Nagy ZP, Ubaldi FM.  
297 Correlation between standard blastocyst morphology, euploidy and implantation: an  
298 observational study in two centers involving 956 screened blastocysts. *Hum Reprod* 2014; **29**  
299 :1173–1181.
- 300 Capalbo, A, Filippo MU, Danilo C, Roberta M, Cristina P, Ludovica D, Federica S, Laura B,  
301 Roberta V, Laura R. Consistent and reproducible outcomes of blastocyst biopsy and aneuploidy  
302 screening across different biopsy practitioners: a multicentre study involving 2586 embryo  
303 biopsies. *Hum Reprod* 2015; **31** :199–208.
- 304 Cecchino, Gustavo N., and Juan A. Garcia-Velasco. "Mitochondrial DNA copy number as a  
305 predictor of embryo viability." *Fert Steri* 2019; **111** :205-211.
- 306 Chan CC, Liu VW, Lau EY, Yeung WS, Ng EH, Ho PC. Mitochondrial DNA content and 4977  
307 bp deletion in unfertilized oocytes. *Mol Hum Reprod.* 2005; **11** :843–846.
- 308 Chang J, Boulet SL, Jeng G, Flowers L, Kissin DM. Outcomes of in vitro fertilization with  
309 preimplantation genetic diagnosis: an analysis of the United States Assisted Reproductive  
310 Technology Surveillance Data, 2011–2012. *Fertil Steril* 2016; **105** :394-400.

311 Colaco S, Sakkas D. Paternal factors contributing to embryo quality. *J Assist Reproduct Genet*  
312 2018; **25**:19531-19616.

313 de los Santos, Maria J, Antonio DJ, Amparo M, Amparo M, Marcos Mr, Carmen R, Antonio P.  
314 "Variables associated with mitochondrial copy number in human blastocysts: what can we learn  
315 from trophoctoderm biopsies?." *Fert Steril* 2018; **109** :110-117.

316 Demko ZP, Simon AL, McCoy RC, Petrov DA, Rabinowitz M. Effects of maternal age on  
317 euploidy rates in a large cohort of embryos analyzed with 24-chromosome single-nucleotide  
318 polymorphism–based preimplantation genetic screening. *Fertil Steril* 2016; **105** :1307–1313.

319 Diez-Juan A, Rubio C, Marin C, Martinez S, Al-Asmar N, Riboldi M, Díaz-Gimeno P, Valbuena  
320 D, Simón C. Mitochondrial DNA content as a viability score in human euploid embryos: less is  
321 better. *Fertil Steril* 2015; **104** :534–541.

322 Fragouli E, Alfarawati S, Spath K, Jaroudi S, Sarasa J, Enciso M, Wells D. The origin and impact  
323 of embryonic aneuploidy. *Hum Genet* 2013; **132** :1001–1013.

324 Fragouli E, McCaffrey C, Ravichandran K, Spath K, Grifo JA, Munné S, Wells D. Clinical  
325 implications of mitochondrial DNA quantification on pregnancy outcomes: a blinded prospective  
326 non-selection study. *Human Reprod* 2017; **32**: 2340–2347.

327 Fragouli E, Spath K, Alfarawati S, Kaper F, Craig A, Michel CE, Kokocinski F, Cohen J, Munne  
328 S, Wells D. Altered levels of mitochondrial DNA are associated with female age, aneuploidy, and  
329 provide an independent measure of embryonic implantation potential. *PLoS Genet* 2015; **3**  
330 :e1005241.

331 Gardner DK, Lane M, Stevens J, Schlenker T, Schoolcraft WB. Blastocyst score affects  
332 implantation and pregnancy outcome: towards a single blastocyst transfer, *Fertil Steril* 2000; **73**  
333 :1155-1158.

334 Humaidan, Peter, Stine Gry Kristensen, and Kevin Coetzee. "Mitochondrial DNA, a new  
335 biomarker of embryonic implantation potential: fact or fiction?" *Fertil Steril* 2018; **109** :61-62.

336 Kim J, Seli E. Mitochondria as a Biomarker for IVF Outcome. *Reproduct* 2019; **157** : 235–242.

337 Klimczak, Amber M., Lucia E. Pacheco, Kelsey E. Lewis, Niloofar Massahi, Jon P. Richards,  
338 William G. Kearns, Antonio F. Saad, and John R. Crochet. "Embryonal mitochondrial DNA:  
339 relationship to embryo quality and transfer outcomes." *J Assist Reproduct Genet* 2018; **35** :871-  
340 877.

341 Leese, Henry J. "Quiet please, do not disturb: a hypothesis of embryo metabolism and  
342 viability." *BioEssays* 2002; **24** :845-849.

343 Miao L, Kikuchi K, Sun Y, Schatten H. Oocyte aging: cellular and molecular changes,  
344 developmental potential and reversal possibility. *Hum Reprod Update*. 2009; **15** :573-585.

345 Minasi MG, Colasante A, Riccio T, Ruberti A, Casciani V, Scarselli F, Spinella F, Fiorentino F,  
346 Varricchio MT, Greco E. Correlation between aneuploidy, standard morphology evaluation and  
347 morphokinetic development in 1730 biopsied blastocysts: a consecutive case series study. *Hum*  
348 *Reprod* 2016; **31** :2245–2254.

349 Murakoshi Y, Sueoka K, Takahashi K, Sato S, Sakura T, Tajima H, Yoshimura Y, Embryo  
350 developmental capability and pregnancy outcome are related to the mitochondrial DNA copy  
351 number and ooplasmic volume. *J Assist Reproduct Genet* 2013; **30** :1367-1375.

352 Ogino M, Tsubamoto H, Sakata K, Oohama N, Hayakawa H, Kojima T, Shigeta M, Shibahara H.  
353 Mitochondrial DNA copy number in cumulus cells is a strong predictor of obtaining good-quality  
354 embryos after IVF. *J Assist Reproduct Genet* 2016; **33** :367-371.

355 Oron G, Son WY, Buckett W, Tulandi T, Holzner H. The association between embryo quality  
356 and perinatal outcome of singletons born after single embryo transfers: a pilot study. *Hum Reprod*.

2014; **29** :1444–1451.

Qiu Y, Chen S, Chen D, Liu P, Xia J, Yang L, Song Z, Shi Q, Xie L, Zhu Z, Du Y. The mitochondrial DNA content can not predict the embryo viability. *bioRxiv*. 2018; **1** :445940.

Ravichandran K, McCaffrey C, Grifo J, Morales A, Perloe M, Munne S, Wells D, Fragouli E. Mitochondrial DNA quantification as a tool for embryo viability assessment: retrospective analysis of data from single euploid blastocyst transfers. *Hum Reprod* 2017; **32** :1282–1292.

Revel, A. Defective endometrial receptivity. *Fertil Steril* 2012; **97** :1028-1032.

Sen S, Dixit A, Thakur C, Gokral J, Hinduja I, Zaveri K, Thangaraj K, Modi D. Association of progesterone receptor gene polymorphism with male infertility and clinical outcome of ICSI. *Journal of assisted reproduction and genetics*. 2013; **30** :1133-1139.

Seli E. Mitochondrial DNA as a biomarker for in-vitro fertilization outcome. *Curr Opin Obstet Gynecol*, 2016; **28** :158-163.

Treff NR, Zhan Y, Tao X, Olcha M, Han M, Rajchel J, Morrison L, Morin SJ, Scott Jr RT. Levels of trophoctoderm mitochondrial DNA do not predict the reproductive potential of sibling embryos. *Hum Reprod*. 2017; **32** :954-962.

Van de Velde H, De Vos A, Joris H, Nagy ZP, Van Steirteghem AC. Effect of timing of oocyte denudation and micro-injection on survival, fertilization and embryo quality after intracytoplasmic sperm injection. *Hum Reprod*. 1998; **13** :3160-3164.

Victor AR, Brake AJ, Tyndall JC, Griffin DK, Zouves CG, Barnes FL, Viotti M. Accurate quantitation of mitochondrial DNA reveals uniform levels in human blastocysts irrespective of ploidy, age, or implantation potential. *Fertil Steril* 2017; **107** :34-42.

Wells D, Kaur K, Grifo J, Glassner M, Taylor JC, Fragouli E, Munne S. Clinical utilisation of a rapid low-pass whole genome sequencing technique for the diagnosis of aneuploidy in human

- 380 embryos prior to implantation. *Journal of medical genetics*. 2014; **51**:553-62.
- 381 Wells D. Mitochondrial DNA quantity as a biomarker for blastocyst implantation potential. *Fertil*
- 382 *Steril*. 2017; **108** :742-747.
